# Supplementary material
Source: PubMed Central journal article supplement (PMC2951710)
Supplement: 97320630004233S1.pdf [file 97320630004233S1.pdf]

## Supplementary material:

**Table1:** Comparative binding Energy Scores of the five antioxidants

| Antioxidants                 | MolDock Score<br>(Energy Score) | H-bond interaction<br>energy | Common interacting residues                          |
|------------------------------|---------------------------------|------------------------------|------------------------------------------------------|
| Dipiperoyl ester of curcumin | -200.299                        | -3.393                       | Pro 482, Glu 512, Pro 513, Tyr 522, Thr 651, Thr 655 |
| Lycopene                     | -182.405                        | -2.5                         | Pro 482, Leu485, Pro513, Tyr522, Thr651, Thr655      |
| Curcumin                     | -151.557                        | -3.8                         | Leu485, Glu486, Thr651, Thr655                       |
| Tocopherol                   | -128.9                          | 0.27                         | Leu485, Glu486, Glu512, Pro 513, Tyr 522             |
| Ascorbic acid                | -94.5                           | -19.4                        | Leu485, Glu486, Glu512                               |
